# Supplementary material
Source: publisher site journal article supplement (https://www.dovepress.com/article/412446)
Supplement: Supplementary file 1 [file get_supplementary_file.php]

| <b>Cancer Site</b>                 | <b>All races/<br/>ethnicities</b> | <b>NHW</b> | <b>NHB</b> | <b>NH<br/>AI/AN</b> | <b>NH A/PI</b> | <b>Hispanic<br/>(any race)</b> | <b>Ratio<br/>Hispanic<br/>to NHW</b> |
|------------------------------------|-----------------------------------|------------|------------|---------------------|----------------|--------------------------------|--------------------------------------|
| <b>All Cancer Sites</b>            | 449.4                             | 466.6      | 453.8      | 352.6               | 396.3          | 295.5                          | 0.63                                 |
| <b>Colon and<br/>Rectum</b>        | 37.7                              | 37.7       | 43         | 41.2                | 29.4           | 33.7                           | 0.89                                 |
| <b>Liver</b>                       | 8.6                               | 7.3        | 10.7       | 14.8                | 12.2           | 13.8                           | 1.89                                 |
| <b>Pancreas</b>                    | 13.2                              | 13.2       | 16.2       | 11.7                | 9.6            | 11.9                           | 0.90                                 |
| <b>Lung and<br/>Bronchus</b>       | 56.3                              | 60.6       | 58.2       | 54.4                | 34.2           | 29.2                           | 0.48                                 |
| <b>Melanoma of the<br/>Skin</b>    | 22.9                              | 29.8       | 1          | 8.7                 | 1.3            | 4.7                            | 0.16                                 |
| <b>Breast</b>                      | 68.3                              | 70.4       | 72.6       | 55.1                | 55.5           | 52.8                           | 0.75                                 |
| <b>Cervix Uteri</b>                | 7.7                               | 7.2        | 8.8        | 9.5                 | 6.1            | 9.7                            | 1.35                                 |
| <b>Prostate</b>                    | 109.9                             | 103.6      | 176.2      | 73.4                | 57.2           | 87.3                           | 0.84                                 |
| <b>Urinary Bladder</b>             | 19.4                              | 21.9       | 11.5       | 12.1                | 8.3            | 10.8                           | 0.49                                 |
| <b>Kidney and Renal<br/>Pelvis</b> | 17.3                              | 17.5       | 19.1       | 24.2                | 8.1            | 17.5                           | 1.00                                 |

Table S1. Centers for Disease Control and prevention U.S. Cancer statistics (CDC USCS) age-Adjusted incidence rates for the ten most common types of cancer from 2015-2019. Rates are per 100,000 and are age-adjusted to the 2000 US Std Population (19 age groups - Census P25-1130).
